# Supplementary material for: Characterization of Antioxidant Activity of Heated Mycosporine-like Amino Acids from Red Alga Dulse Palmaria palmata in Japan
Source: MDPI journal article supplement (doi:10.3390/md20030184), 2022-03-01
Supplement: s1 [file s1]

# Supplementary Materials

## Characterization of Antioxidant Activity of Heated Mycosporine-Like Amino Acids from Red Alga Dulse *Palmaria palmata* in Japan

Yuki Nishida <sup>1</sup>, Wataru Saburi <sup>2</sup>, Yoshikatsu Miyabe <sup>1,3</sup>, Hideki Kishimura <sup>4,\*</sup> and Yuya Kumagai <sup>4,\*</sup>

<sup>1</sup> Marine Chemical Resource Development, Graduate School of Fisheries Sciences, Hokkaido University, Hakodate 041-8611, Hokkaido, Japan; karakuchi@eis.hokudai.ac.jp (Y.N.)

<sup>2</sup> Fundamental AgriScience Research, Research Faculty of Agriculture, Hokkaido University, Kita 9 Nishi 9, Kita-ku, Sapporo, 060-8589, Japan; saburi@chem.agr.hokudai.ac.jp (W.S.)

<sup>3</sup> Food Research Institute, Aomori Prefectural Industrial Technology Research Center, 2-10 Chikkogai, Hachinohe-shi 031-0831, Aomori-ken, Japan; yoshikatsu\_miyabe@aomori-itc.or.jp (Y.M.)

<sup>4</sup> Marine Chemical Resource Development, Faculty of Fisheries Sciences, Hokkaido University, Hakodate 041-8611, Hokkaido, Japan; i-dulse@fish.hokudai.ac.jp (H.K.); yuyakumagai@fish.hokudai.ac.jp (Y.K.)

\* Correspondence: i-dulse@fish.hokudai.ac.jp (H.K.); yuyakumagai@fish.hokudai.ac.jp (Y.K.)

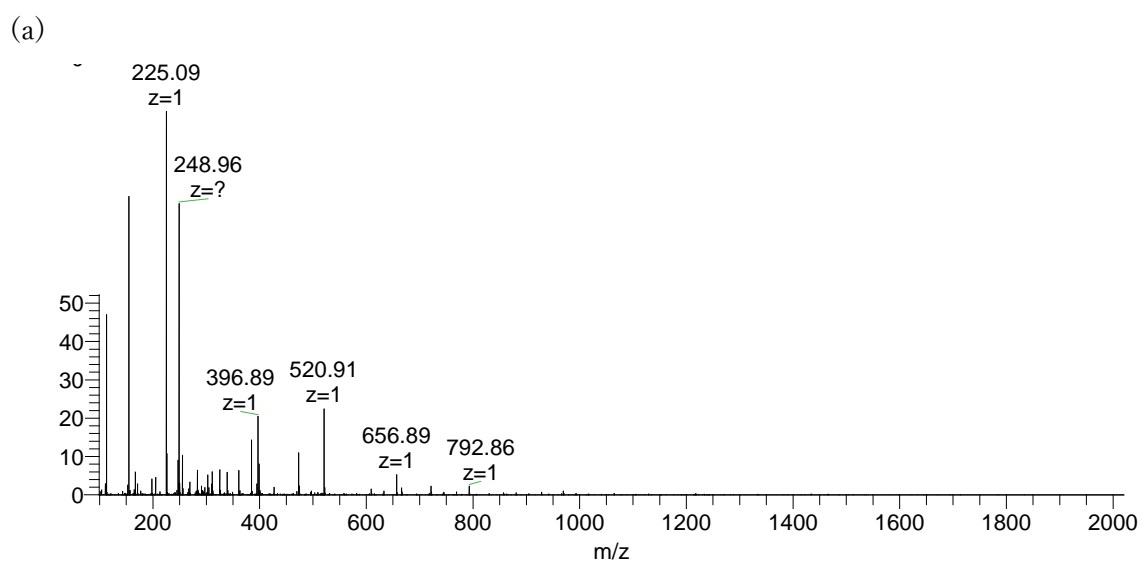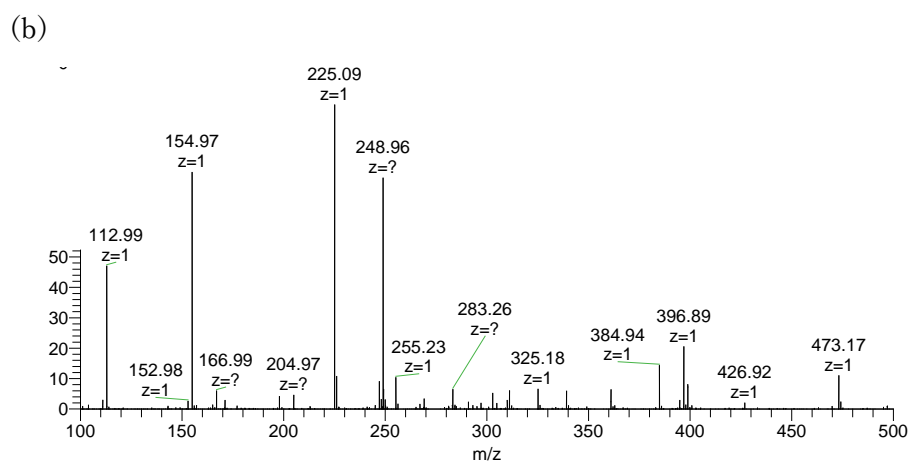

**Figure S1.** ESI-MS of heated palythine. (a) Whole range of 100-2,000  $m/z$ , (b) zoom up range of 100-500  $m/z$ .

(a)

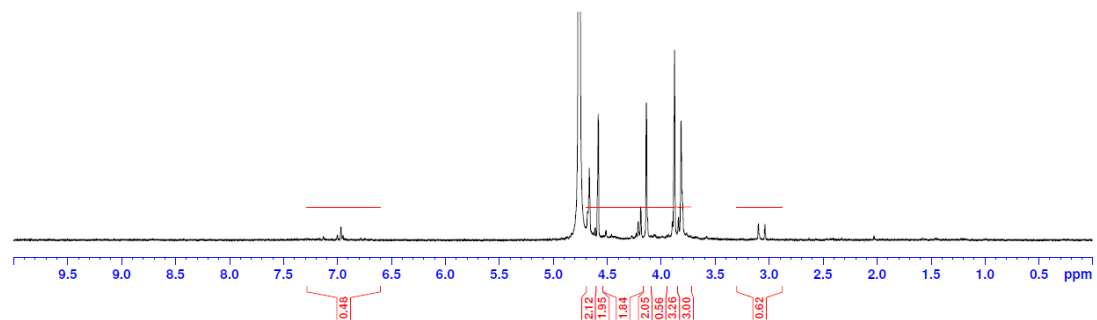

(b)

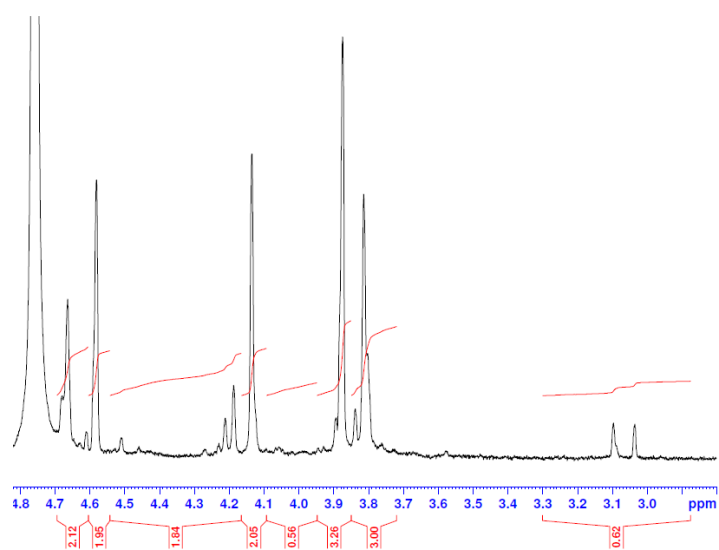

**Figure S2.**  $^1\text{H}$ -NMR of heated palythine. (a) Whole, (b) zoom up.

(a)

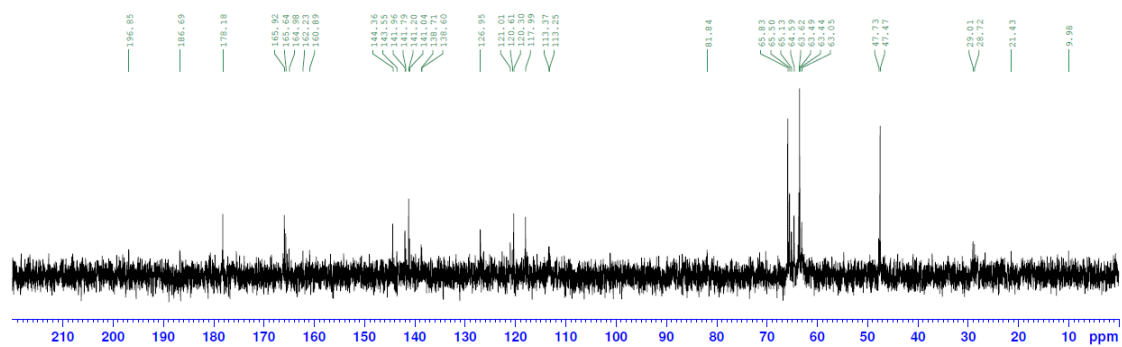

(b)

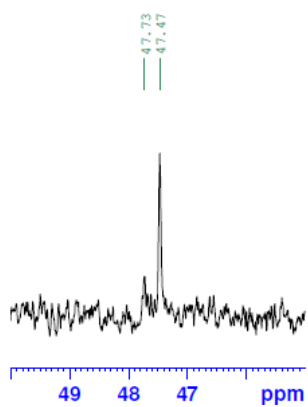

(c)

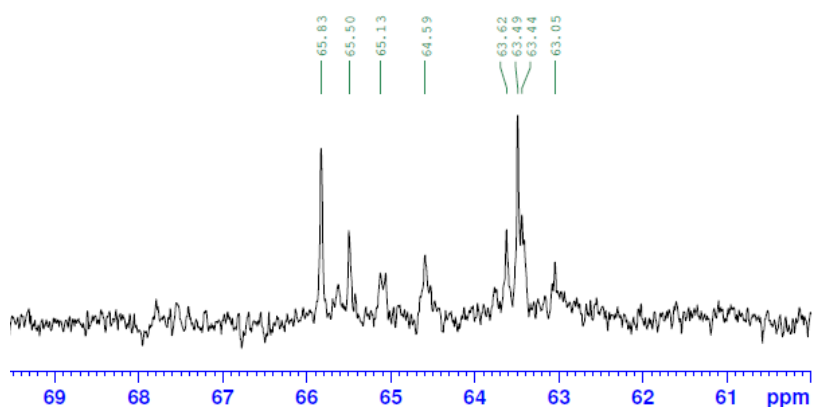

(d)

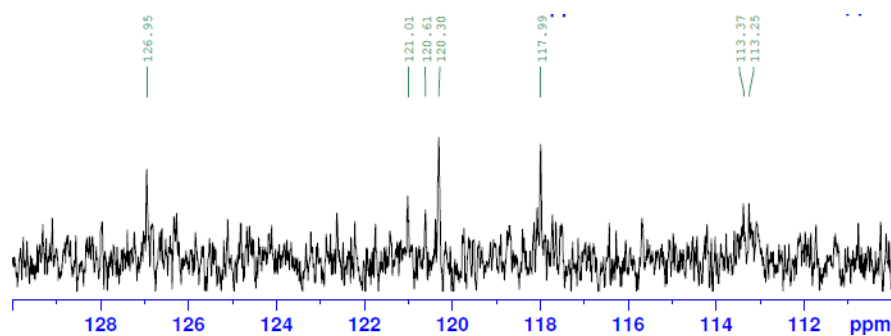

(e)

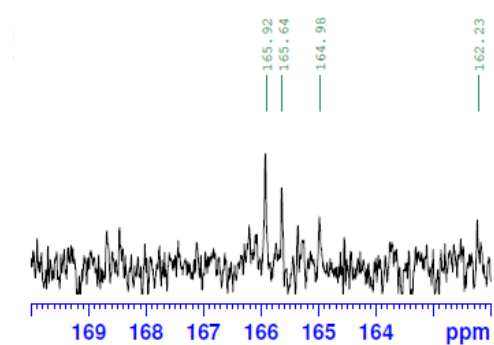

**Figure S3.** <sup>13</sup>C-NMR of heated palythine. (a) Whole, (b) zoom up of 47-49 ppm, (c) zoom up of 61-69 ppm, (d) zoom up of 112-128 ppm, (e) zoom up of 164-169 ppm.
